# Supplementary material
Source: MDPI journal article supplement (https://www.mdpi.com/2039-4713/14/2/32)
Supplement: s1 [file s1]

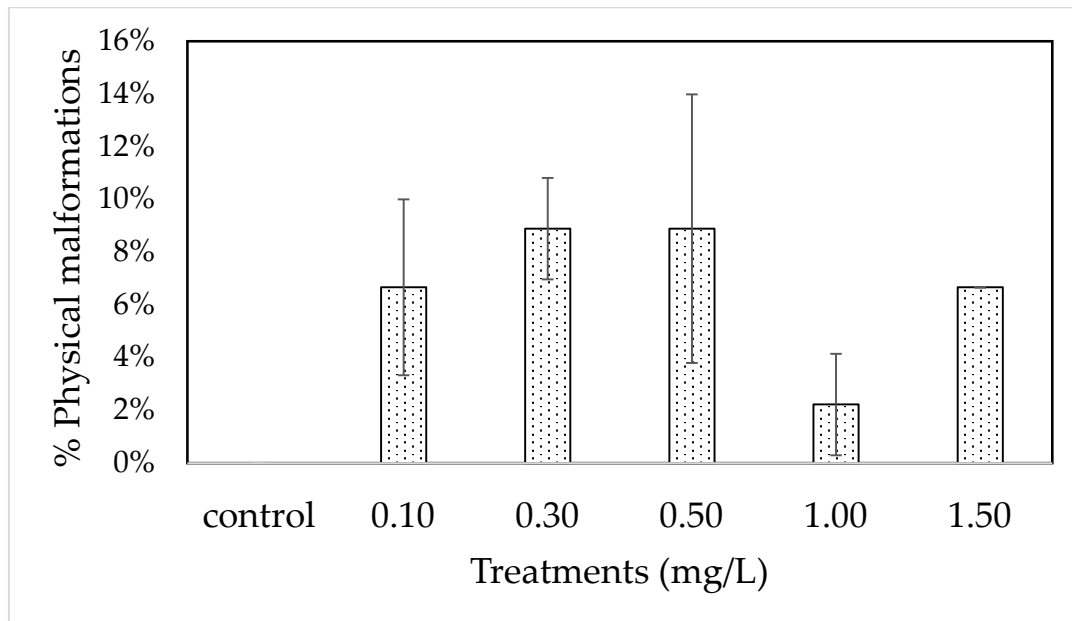

**Figure. S1. Percentage of physical malformations in zebrafish larvae exposed to BP-3.**

The groups that presented a higher percentage of physical malformations were at concentrations of 0.30 and 0.50 mg/L, with 9% malformation. No deformations were observed in the control groups. All groups exposed to BP-3 presented some physical malformations. The group that presented the lowest percentage of physical malformation was the 1.0 mg/L group, with 2%. Significant differences were found with a value of  $p=0.008$ .  $n=3$
